# Supplementary material for: The Impact of Direct Challenges to Student Endorsement of Teleological Reasoning on Understanding and Acceptance of Natural Selection
Source: Research Square preprint supplement (doi:10.21203/rs.3.rs-1226177/v1), 2022-01-06
Supplement: Supplementary file 2 [file 2c5d30888c736216ba3599b6.docx]

**Additional file 1.** The following survey items were selected from a larger sample developed by Kelemen et al (2013). Participants were asked to select how they would respond to each of the following statements using a 5-point Likert scale, where 1=Strongly Disagree, 2=Disagree, 3=Neither Agree or Disagree, 4=Agree, 5=Strongly Agree. Following each item is its designation as unwarranted teleological (UT), true teleological (TT), false teleological (FT), true causal (TC), and false causal (FC), from Kelemen et al (2013). Only student responses to the UT statements were used in the analysis. Likert-score responses were averaged across the 20 UT statements.

1. Bats hunt mosquitoes in order to control over-population. (UT)
2. Cows have udders in order to allow farmers to milk them. (FT)
3. Bees frequent flowers in order to aid pollination. (UT)
4. Alarm clocks beep in order to wake people up. (TT)
5. Birds transfer seeds in order to help plants germinate. (UT)
6. Bicycles have handlebars so that people can steer them. (TT)
7. Trees produce oxygen so that animals can breathe. (UT)
8. Male lions have large manes because they are carnivores. (FC)
9. Butter is greasy because it contains a great deal of fat. (TC)
10. Moss forms around rocks in order to stop soil erosion. (UT)
11. Water exists so that life can survive on Earth. (UT)
12. Doctors prescribe antibiotics in order to treat infections. (TT)
13. Conception occurs because sperm and egg cells fuse together. (TC)
14. The fittest animals survive so that species can grow stronger. (UT)
15. Potatoes contain starch because they grow in the ground. (FC)
16. The moon shines brightly because it has many craters. (FC)
17. Finches diversified in order to survive. (UT)
18. Earthworms tunnel underground in order to aerate the soil. (UT)
19. Candles melt because the wax becomes very hot. (TC)
20. Window blinds have slats so that they can capture dust. (FT)
21. Germs mutate in order to become drug resistant. (UT)
22. Objects fall downwards because they are affected by gravity. (TC)
23. Lemurs have adapted in order to avoid extinction. (UT)
24. Parasites multiply in order to infect a host. (UT)
25. People chew food in order to strengthen their jaws. (FT)
26. Children wear mittens in the winter in order to keep their hands warm. (TT)
27. Molecules fuse in order to create matter. (UT)
28. Rain falls in order to allow plants to grow. (UT)
29. The sun makes light so that plants can photosynthesize. (UT)
30. The Earth rotates around the sun so that it can receive light. (UT)
31. Polar bears are white because they swim in icy water. (FC)
32. Kittens have soft fur so that people will want to pet them. (FT)
33. The Earth has an ozone layer in order to protect it from UV light. (UT)
34. Hurricanes circulate seawater in order to gather energy. (UT)
35. Microbes convert nitrogen in order to enrich the soil. (UT)
36. Mites live on skin in order to eliminate dead skin cells. (UT)
